# Supplementary material
Source: PubMed Central journal article supplement (PMC2840131)
Supplement: 0909480107_pnas.200909480SI.pdf [file 0909480107_pnas.200909480SI.pdf]

# Supporting Information

Corl et al. 10.1073/pnas.0909480107

## SI Materials and Methods

**Testing for the Direction of Changes in Body Size.** To further understand the accelerated phenotypic evolution correlated with morph loss, we determined the direction of phenotypic evolution in dimorphic/monomorphic populations. We compared body size within each sex among populations using a two-sample *t*-test in the program Systat 10.2. Dimorphic and monomorphic populations were compared with closely related trimorphic populations (Table S1 and Table S2) as determined by our phylogeny (Fig. 3 in main text). We used phylogenetically independent sets of trimorphic populations for these pairwise comparisons (i.e., the evolutionary paths linking the pairs were not shared [see Maddison (1)]). The dimorphic population 11 (Pisgah Lava Flow) was compared with the geographically and phylogenetically closest trimorphic population (Power = population 10). The other dimorphic populations were closely related to two different trimorphic populations and were individually compared with each population (Table S1). The comparisons of each dimorphic population with two different trimorphic populations are not statistically independent (because the two trimorphic populations have a shared evolutionary history), but they show whether the results vary depending on the trimorphic population used in the comparison. We grouped data from all monomorphic populations sharing the same morph loss event and compared them with a set of trimorphic populations (Table S2). Data from population 31 was not used in the comparisons because its phylogenetic placement was uncertain when multiple population samples were analyzed [see supporting information in Corl et al. (2)].

## SI Results

Three of the four dimorphic populations (Pisgah Lava Flow = population 11, Anacapa Island = 8, and Monserrat Island = 19) had significantly larger males than closely related trimorphic populations (Table S1). Anacapa Island also had significantly larger

females ( $P < 0.001$ ). Monserrat Island had significantly larger females when compared with population 22 ( $P = 0.017$ ) but not when compared with population 21 ( $P = 0.210$ ). In both cases in which there were increases in female size, male size increased by a greater degree. Therefore, the predominant changes in body size in these dimorphic populations are increases in male size. These three populations also had increases in sexual size dimorphism (SSD) as a result of the increases in male body size (Table S1). The final dimorphic population (Santa Catalina Island = 20) had no significant changes in either male or female size.

Both independent sets of monomorphic *ob* populations had significant reductions in male body size (Table S2). Monomorphic *ob* populations in California (populations 4 and 5) also had significant reductions in female size ( $P < 0.001$ ), but monomorphic *Uta stansburiana uniformis* populations (populations 26–30) had no significant changes in female size ( $P = 0.423$ ). Monomorphic orange populations in Utah (populations 33 and 34) had significantly larger females ( $P = 0.004$ ) than a closely related trimorphic population (population 32) and no significant changes in male size ( $P = 0.300$ ). Monomorphic orange *U. s. stansburiana* populations (populations 37–41) had no significant changes in body size, although males tended toward being smaller ( $P = 0.068$ ) and females tended toward being larger ( $P = 0.102$ ).

**Testing for Body Size Differences Among Morphs.** We performed an ANOVA to test whether the three male morphs differed in snout-vent length, which was our measure of body size. For this test, we used the same data from our focal study population at Los Baños that was used to calculate OBY (for orange, blue, and yellow) allele frequencies in Fig. 1 (main text) and Table S3. Average body size did not show significant differences among the morphs (orange = 57.9 mm, blue = 58.5 mm, yellow = 57.3 mm;  $F_{2, 34} = 0.69$ ;  $P = 0.509$ ).

1. Maddison WP (2000) Testing character correlation using pairwise comparisons on a phylogeny. *J Theor Biol* 202:195–204.

2. Corl A, Davis AR, Kuchta SR, Comendant T, Sinervo B (2010) Alternative mating strategies and the evolution of sexual size dimorphism in the side-blotched lizard, *Uta stansburiana*: A population-level comparative analysis. *Evolution* 64:79–96.





**Table S3. Populations, years sampled, sample sizes, and OBY allele frequencies**

| Population no. | Population name, state                                 | Years data collected  | Females (n) | Males (n) | Total (n) | Morpha (n) | M frequency |       |       | F frequency |       |       |
|----------------|--------------------------------------------------------|-----------------------|-------------|-----------|-----------|------------|-------------|-------|-------|-------------|-------|-------|
|                |                                                        |                       |             |           |           |            | O           | B     | Y     | O           | B     | Y     |
| 1              | Corral Hollow, CA                                      | 2004                  | 35          | 15        | 50        | 3          | 0.033       | 0.5   | 0.467 | 0.314       | 0.171 | 0.514 |
| 2              | Los Baños, CA                                          | 2003                  | 35          | 37        | 72        | 3          | 0.122       | 0.486 | 0.392 | 0.371       | 0.271 | 0.357 |
| 3              | Pinnacles National Monument, CA                        | 2003                  | 9           | 15        | 24        | 3          | 0.4         | 0.433 | 0.167 | 0.556       | 0.222 | 0.222 |
| 4              | Big Creek University of California Reserve, CA         | 2002                  | 5           | 7         | 12        | 1          | 0           | 1     | 0     | 0           | 1     | 0     |
| 5              | Nacimiento Road, CA                                    | 2004, 2005            | 24          | 34        | 58        | 1          | 0           | 1     | 0     | 0           | 1     | 0     |
| 6              | Sedgwick University of California Reserve Reserve, CA  | April 2002, June 2002 | 13          | 26        | 39        | 3          | 0.154       | 0.673 | 0.173 | 0.423       | 0.308 | 0.269 |
| 7              | Santa Cruz Island, Channel Islands National Park, CA   | 2003                  | 28          | 34        | 62        | 3          | 0.412       | 0.456 | 0.132 | 0.375       | 0.339 | 0.286 |
| 8              | Anacapa Island, Channel Islands National Park, CA      | 2003                  | 59          | 55        | 114       | 2          | 0.018       | 0.982 | 0     | 0.008       | 0.992 | 0     |
| 9              | Stunt Ranch U.C. Reserve and Cold Creek Preserve, CA   | 2002, 2007            | 24          | 20        | 44        | 3          | 0.288       | 0.413 | 0.3   | 0.25        | 0.313 | 0.438 |
| 10             | Power (Off-Lava Site), CA                              | 2003, 2004, 2005      | 52          | 55        | 107       | 3          | 0.355       | 0.536 | 0.109 | 0.519       | 0.202 | 0.279 |
| 11             | Pisgah Lava Flow, CA                                   | 2003, 2004, 2005      | 44          | 47        | 91        | 2          | 0.277       | 0.723 | 0     | 0.455       | 0.545 | 0     |
| 12             | Granite Mountains University of California Reserve, CA | 2002, 2003            | 16          | 21        | 37        | 3          | 0.167       | 0.619 | 0.214 | 0.375       | 0.469 | 0.156 |
| 13             | Corn Springs, CA                                       | 2003                  | 6           | 6         | 12        | 3          | 0.25        | 0.583 | 0.167 | 0.5         | 0.333 | 0.167 |
| 14             | Mountain Springs, CA                                   | 2006                  | 8           | 21        | 29        | 3          | 0.429       | 0.548 | 0.024 | 0.438       | 0.5   | 0.063 |
| 15             | Kofa National Wildlife Refuge, AZ                      | 2002, 2004            | 12          | 30        | 42        | 3          | 0.167       | 0.683 | 0.15  | 0.417       | 0.333 | 0.25  |
| 16             | McDowell Mountains, AZ                                 | 2006                  | 11          | 21        | 32        | 3          | 0.286       | 0.619 | 0.095 | 0.455       | 0.364 | 0.182 |
| 17             | Carmen Island, BCS, Mexico                             | 2005                  | 12          | 9         | 21        | 3          | 0.5         | 0.444 | 0.056 | 0.333       | 0.333 | 0.333 |
| 18             | Danzante Island, BCS, Mexico                           | 2005                  | 31          | 19        | 50        | 3          | 0.368       | 0.5   | 0.132 | 0           | 0.21  | 0.79  |
| 19             | Monserrat Island, BCS, Mexico                          | 2005                  | 22          | 7         | 29        | 2          | 0.429       | 0.571 | 0     | 0.682       | 0.318 | 0     |
| 20             | Santa Catalina Island, BCS, Mexico                     | 2005                  | 29          | 23        | 52        | 2          | 0.196       | 0.804 | 0     | 0.948       | 0.052 | 0     |
| 21             | San Jose Island, BCS, Mexico                           | 2003                  | 7           | 7         | 14        | 3          | 0.071       | 0.571 | 0.357 | 0.286       | 0.071 | 0.643 |
| 22             | San Francisco Island, BCS, Mexico                      | 2003                  | 9           | 8         | 17        | 3          | 0.438       | 0.438 | 0.125 | 0.444       | 0     | 0.556 |
| 23             | White Sands National Monument, NM                      | 2002, 2004            | 21          | 27        | 48        | 3          | 0.278       | 0.537 | 0.185 | 0.5         | 0.167 | 0.333 |
| 24             | Guadalupe Mountains National Park, TX                  | 2002, 2004            | 12          | 19        | 31        | 3          | 0.316       | 0.553 | 0.132 | 0.5         | 0.125 | 0.375 |
| 25             | Bitter Lake National Wildlife Refuge, NM               | 2002, 2004            | 15          | 20        | 35        | 3          | 0.3         | 0.425 | 0.275 | 0.2         | 0.133 | 0.667 |
| 26             | Petrified Forest National Park, AZ                     | 2002, 2004            | 10          | 15        | 25        | 1          | 0           | 1     | 0     | 0           | 1     | 0     |
| 27             | Wupatki National Monument, AZ                          | 2002, 2003            | 15          | 11        | 26        | 1          | 0           | 1     | 0     | 0           | 1     | 0     |
| 28             | Zion National Park, UT                                 | 2003, 2004            | 14          | 22        | 36        | 1          | 0           | 1     | 0     | 0           | 1     | 0     |
| 29             | Colorado National Monument, CO                         | 2002, 2004            | 17          | 34        | 51        | 1          | 0           | 1     | 0     | 0           | 1     | 0     |
| 30             | Dinosaur National Monument, UT                         | 2002, 2004            | 19          | 24        | 43        | 1          | 0           | 1     | 0     | 0           | 1     | 0     |
| 31             | Mercury, NV                                            | 2003                  | 15          | 20        | 35        | 3          | 0.325       | 0.45  | 0.225 | 0.533       | 0.033 | 0.433 |
| 32             | Lytle Ranch, UT                                        | 2003                  | 20          | 15        | 35        | 3          | 0.3         | 0.567 | 0.133 | 0.625       | 0.025 | 0.35  |
| 33             | Delta, UT                                              | 2004                  | 7           | 8         | 15        | 1          | 1           | 0     | 0     | 1           | 0     | 0     |
| 34             | Grantsville, UT                                        | 2004                  | 16          | 25        | 41        | 1          | 1           | 0     | 0     | 1           | 0     | 0     |
| 35             | Darwin Falls, Death Valley National Park, CA           | 2003, 2004            | 21          | 15        | 36        | 3          | 0.2         | 0.567 | 0.233 | 0.524       | 0.119 | 0.357 |
| 36             | Daylight Pass, Death Valley National Park, NV          | 2003, 2004            | 13          | 21        | 34        | 3          | 0.167       | 0.619 | 0.214 | 0.654       | 0     | 0.346 |
| 37             | Lovelock, NV                                           | 2003, 2004            | 11          | 9         | 20        | 1          | 1           | 0     | 0     | 1           | 0     | 0     |
| 38             | Warner Mountains, CA                                   | 2006                  | 13          | 17        | 30        | 1          | 1           | 0     | 0     | 1           | 0     | 0     |
| 39             | Burns, OR                                              | 2006                  | 31          | 19        | 50        | 1          | 1           | 0     | 0     | 1           | 0     | 0     |
| 40             | Horseshoe, OR                                          | 2003, 2006            | 18          | 26        | 44        | 1          | 1           | 0     | 0     | 1           | 0     | 0     |
| 41             | Vantage, WA                                            | 2003, 2006            | 20          | 31        | 51        | 1          | 1           | 0     | 0     | 1           | 0     | 0     |

Global positioning system coordinates for each population can be found in Supplemental Table 1 of Corl et al. (2). Note that Los Baños has been continuously sampled since 1990, and Anacapa Island has been continuously sampled since 2000. A single representative year's data for each of these two populations is given to provide equal sample sizes. Sample sizes for the allele frequency data are twice the sample size of each sex, because each lizard has two OBY (for orange, blue, and yellow) alleles. Populations fixed for blue throats bordered by orange are depicted as being fixed for the blue allele, to distinguish them from populations in which both orange and blue alleles segregate. M, males; F, females.
